# Supplementary material for: Highly CO2sensitive extruded fluorescent plastic indicator film based on HPTS
Source: Royal Society of Chemistry journal article supplement (doi:10.1039/c5an02239h), 2015-12-14
Supplement: c5an02239h1.pdf [file c5an02239h1.pdf]

### Supplementary Information S1

SEM micrographs of a typical HPTS-LDPE film, recorded using a SFEI Quanta FEG - **Environmental Scanning Electron Microscope (E-SEM)** with EDX, elemental analysis attachment.

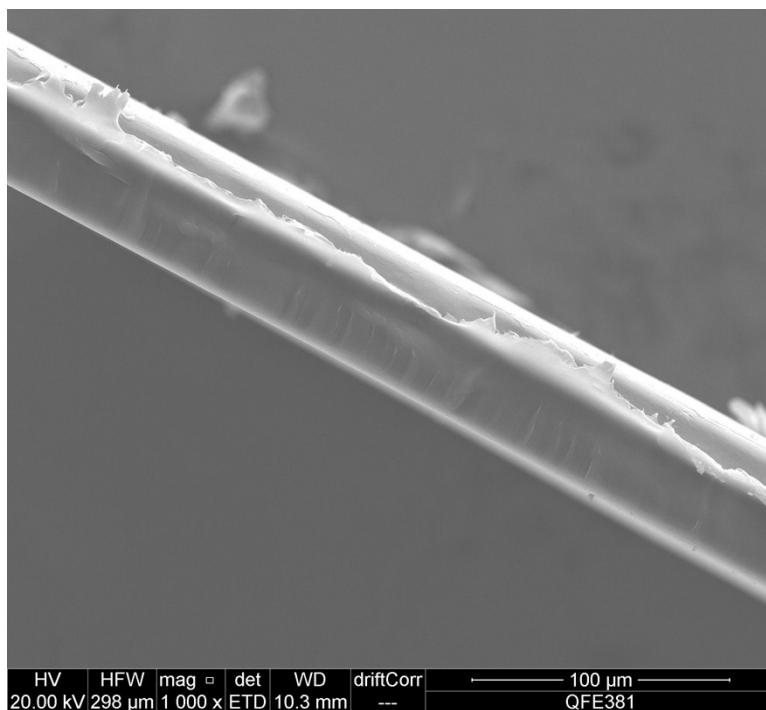

SEM side on view of HPTS/LDPE film

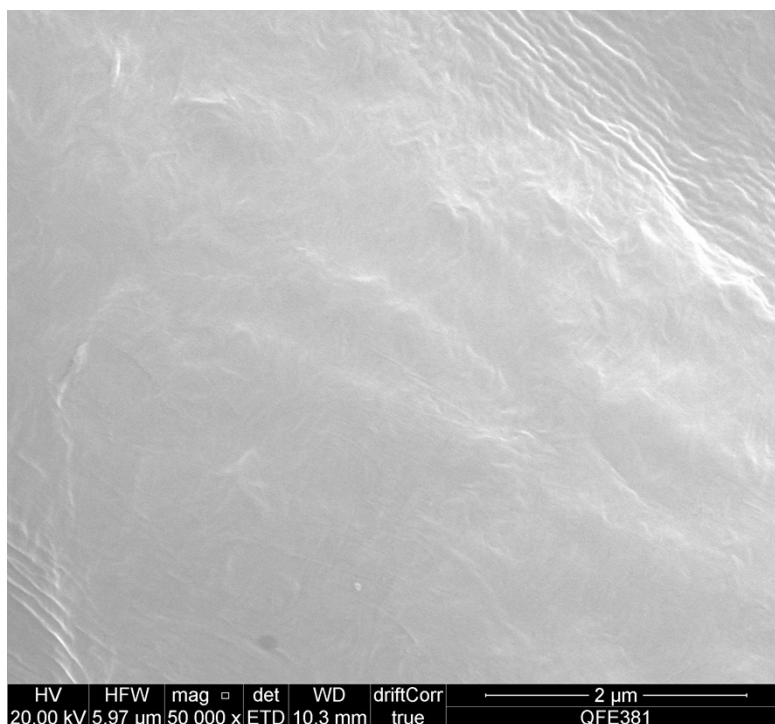

Close up of film

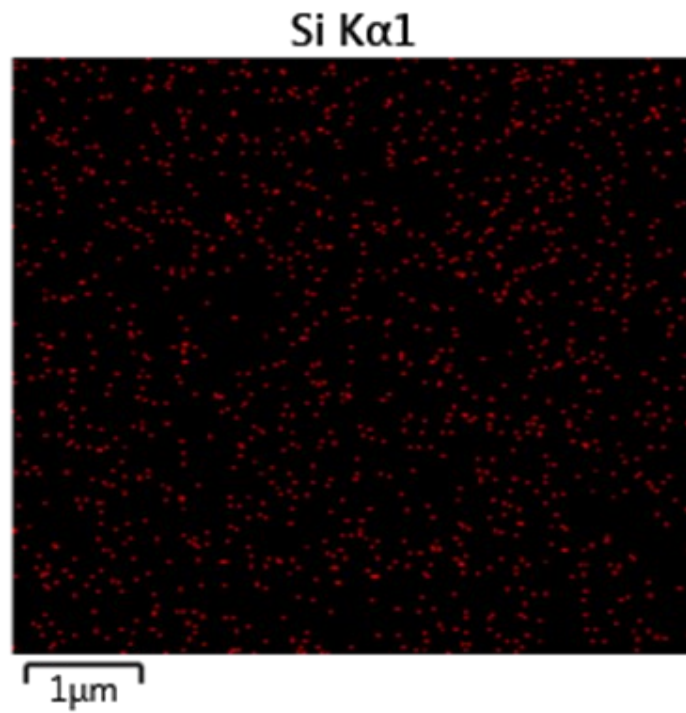

EDX image of previous SEM for Si K $\alpha$  line showing, in red, the distribution of SiO<sub>2</sub> particles throughout the film

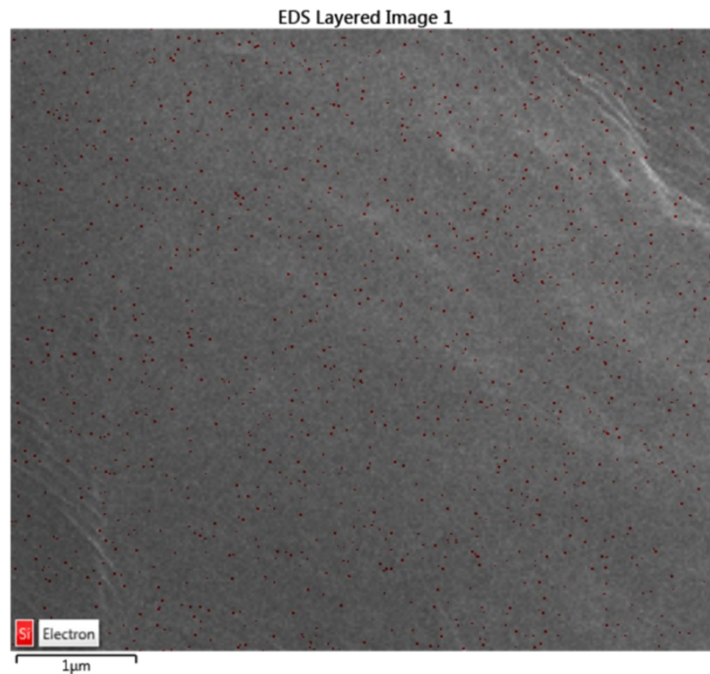

Alternative image of EDX for Si K $\alpha$  data above.
